# Supplementary material for: Mesenchymal Stromal Cell-Derived Extracellular Vesicles Reduce Neuroinflammation, Promote Neural Cell Proliferation and Improve Oligodendrocyte Maturation in Neonatal Hypoxic-Ischemic Brain Injury
Source: PubMed Central journal article supplement (PMC7758466; doi:10.3389/fncel.2020.601176), 2020-12-10
Supplement: Data_Sheet_1.pdf [file Data_Sheet_1.pdf]

## **Supplemental Material**

### **Mesenchymal stromal cell-derived extracellular vesicles reduce neuroinflammation, promote neural cell proliferation and improve oligodendrocyte maturation in neonatal hypoxic-ischemic brain injury**

Nicole Kaminski<sup>1\*</sup>, Christian Köster<sup>1\*</sup>, Yanis Mouloud<sup>2</sup>, Verena Börger<sup>2</sup>, Ursula Felderhoff-Müser<sup>1</sup>, Ivo Bendix<sup>1</sup>, Bernd Giebel<sup>2</sup>, Josephine Herz<sup>1#</sup>

<sup>1</sup> *Department of Pediatrics I, Neonatology & Experimental Perinatal Neurosciences, University Hospital Essen, University Duisburg-Essen, Essen, Germany*

<sup>2</sup> *Institute for Transfusion Medicine, University Hospital Essen, University Duisburg-Essen, Essen, Germany*

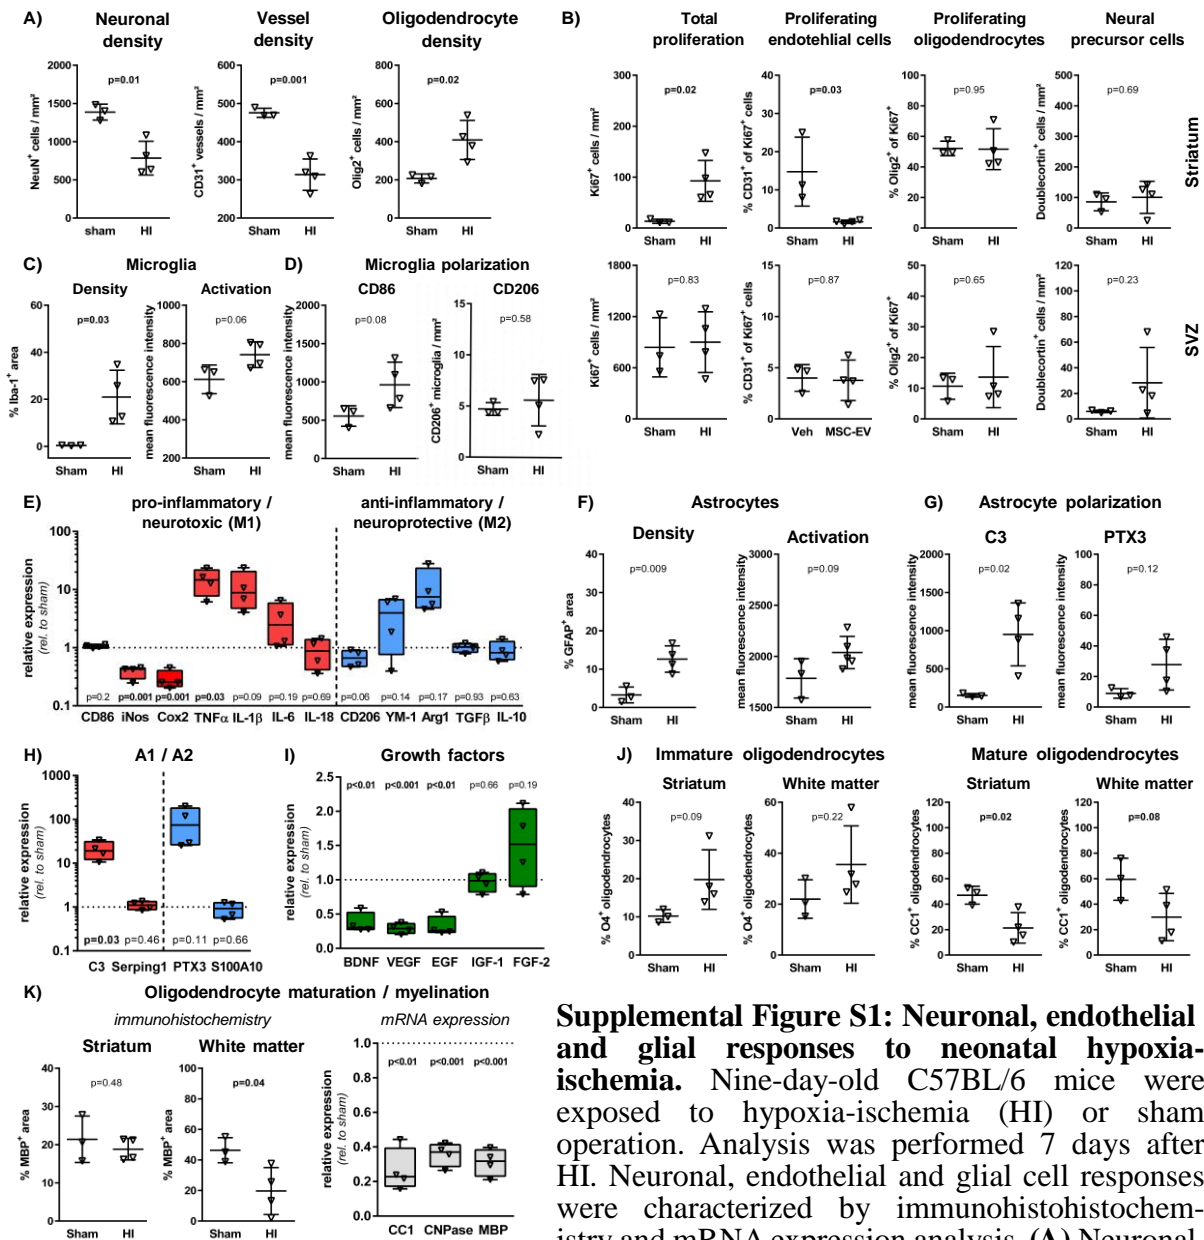

**Supplemental Figure S1: Neuronal, endothelial and glial responses to neonatal hypoxia-ischemia.** Nine-day-old C57BL/6 mice were exposed to hypoxia-ischemia (HI) or sham operation. Analysis was performed 7 days after HI. Neuronal, endothelial and glial cell responses were characterized by immunohistochemistry and mRNA expression analysis. **(A)** Neuronal

vessel and oligodendrocyte densities were analyzed via immunohistochemistry for NeuN, CD31 and Olig2, respectively. Analysis was carried out in stitched large scale confocal images of the striatum. Cellular densities were quantified by unbiased automated software-based object detection. **(B)** Cell proliferation was analyzed in the striatum and the subventricular zone in brain tissue sections stained for the proliferation marker Ki67. The percentage of proliferating endothelial cells and oligodendrocytes from all proliferating cells was quantified in tissue sections co-labelled for the endothelial cell marker CD31 and the oligodendrocyte marker Olig2, respectively. No co-labelling could be detected in co-staining of the neural precursor cell marker doublecortin (DCX) with Ki67. Therefore, the absolute amount of DCX positive cells was quantified. **(C)** Microglia density and activation was analyzed in stitched large scale confocal images of the striatum, obtained from brain sections stained for the microglia marker Iba-1. Iba-1 immunoreactivity was quantified by measurement of positively stained areas and fluorescence intensities in positively stained areas, as a measure of microglia activation **(D)**. Expression of typical M1 (CD86) and M2 (CD206) markers were analyzed in CD11b/CD86 and Iba-1/CD206 co-staining. CD45-staining was included in CD11b/CD86 co-staining to exclude confounding effects by peripheral immune cells, i.e. only CD11b+CD45- areas were used for quantification of CD86 expression. **(E)** A broad set of pro-inflammatory M1-phenotype-associated and anti-inflammatory M2-phenotype-associated molecule expression was analyzed via real-time PCR in brain tissues (160  $\mu$ m thickness) obtained from the striatal level (0.5 mm to 0 mm

from bregma). Beta-2-microglobulin served as housekeeping gene and fold change values compared to sham-treated control animals were calculated. **(F)** Astrocyte density and activation was analyzed in GFAP-stained brain tissue sections. Analyses were performed as described for microglia **(C)**. **(G)** Expression of typical A1 (C3) and A2 (PTX3) markers were analyzed in co-staining with GFAP. **(H)** Immunohistochemistry results were confirmed by mRNA expression analysis performed as described for microglia including further typical A1 (Serping-1) and A2 (S100A10) markers. **(I)** Aforementioned mRNA expression analyses also included quantification of essential neural growth factors. **(J-L)** Oligodendrocyte maturation and myelination was investigated in the white matter (external capsule) and the striatum via immunohistochemistry in co-staining for the pan-oligodendrocyte marker Olig2 with either O4 labelling immature oligodendrocytes **(J)** or CC1, labelling mature oligodendrocytes **(K)**. Myelination was assessed by co-staining against MBP **(L, left)**. The percentage of double positive cells from total oligodendrocytes was quantified **(J, K)**. Myelination was quantified by measurement of MBP<sup>+</sup> areas **(L, left)**. Immunohistochemistry analyses were confirmed by mRNA expression analysis of CC1, CNPase and MBP in brain tissues (160 µm thickness) obtained from the striatal level (0.5 mm to 0 mm from bregma). Beta-2-microglobulin served as housekeeping gene and fold change values compared to vehicle-treated control animals were calculated **(L)**. \*p<0.05, \*\*p<0.01, \*\*\*p<0.001, n=12/group

## Supplemental Tables

### Supplemental Table S1: Antibodies used for immunohistochemistry

| antigen      | dilution | reactivity | host   | supplier       | catalog number   |
|--------------|----------|------------|--------|----------------|------------------|
| NeuN         | 1:100    | mouse      | rabbit | Millipore      | ABN78            |
| CD31         | 1:200    | mouse      | rat    | BD Biosciences | 550274           |
| Olig2        | 1:100    | mouse      | rabbit | Millipore      | AB9610           |
| Ki67         | 1:250    | mouse/rat  | rabbit | Abcam          | ab66155          |
| Ki67*        | 1:100    | mouse      | rat    | Thermo         | 14-5698-82       |
| Doublecortin | 1:50     | mouse      | mouse  | Santa Cruz     | sc-271390        |
| APC-CC1      | 1:100    | mouse/rat  | mouse  | Calbiochem     | OP80             |
| MBP          | 1:150    | mouse/rat  | rat    | Abcam          | ab7349           |
| O4           | 1:500    | mouse/rat  | mouse  | Neuromics      | MO15002          |
| Iba-1        | 1:500    | mouse/rat  | rabbit | Wako           | 019-19741        |
| GFAP         | 1:500    | mouse      | rat    | Invitrogen     | 13-0300          |
| GFAP**       | 1:500    | mouse      | mouse  | Convance       | SMI-22           |
| CD86 PE      | 1:20     | mouse      | rat    | BD Pharmingen  | 561963           |
| CD11b FITC   | 1:100    | mouse      | rat    | BD Pharmingen  | 557396           |
| CD45         | 1:100    | mouse      | rat    | BD Pharmingen  | 550539           |
| CD206        | 1:500    | mouse      | goat   | R&D Systems    | AF2535           |
| C3           | 1:50     | mouse      | rat    | Abcam          | ab11862          |
| PTX          | 1:200    | mouse      | rabbit | Enzo           | ALX-210-365-C050 |

\*for co-labelling with anti-Olig2 and anti-NeuN

\*\*for co-labelling with anti-C3

**Supplemental Table S2: TaqMan Assays used for mRNA expression analyses**

| <b>Gene</b>                                          | <b>Abbreviation</b> | <b>Assay ID</b> |
|------------------------------------------------------|---------------------|-----------------|
| <i>pentraxin-3</i>                                   | PTX3                | Mm00477268_m1   |
| <i>complement C3</i>                                 | C3                  | Mm01232779_m1   |
| <i>s100 calcium binding protien A10</i>              | S100A10             | Mm00501458_g1   |
| <i>serping-1</i>                                     | Serping1            | Mm00437835_m1   |
| <i>fibroblast growth factor – 2</i>                  | FGF2                | Mm01285715_m1   |
| <i>cluster of differentiation 86</i>                 | CD86                | Mm00444543_m1   |
| <i>cluster of differentiaion 206</i>                 | CD206               | Mm01329362_m1   |
| <i>vascular endothelial growth factor a</i>          | VEGF                | Mm00437306_m1   |
| <i>2', 3'-cyclic nucleotide 3'-phosphodiesterase</i> | CNPase              | Mm01306640_m1   |
| <i>cyclooxygenase-2</i>                              | Cox2                | Mm03294838_g1   |
| <i>adenomatous polyposis coli</i>                    | CC1                 | Mm00545877_m1   |
| <i>brain-derived neurotrophic factor</i>             | BDNF                | Mm01334043_m1   |
| <i>interleukin-1beta</i>                             | IL-1 $\beta$        | Mm00434228_m1   |
| <i>epidermal growth factor</i>                       | EGF                 | Mm00438696_m1   |
| <i>interleukin-6</i>                                 | IL-6                | Mm00446190_m1   |
| <i>chitinase-like protein 3</i>                      | YM1                 | Mm00657889_mH   |
| <i>nitric oxide synthase 2</i>                       | iNos                | Mm00440502_m1   |
| <i>arginase</i>                                      | Arg1                | Mm00475988_m1   |
| <i>insulin-like growth factor I</i>                  | IGF1                | Mm00439560_m1   |
| <i>transforming growth factor beta-1</i>             | TGF $\beta$         | Mm01178820_m1   |
| <i>interleukin-18</i>                                | IL-18               | Mm00434226_m1   |
| <i>myelin basic protein</i>                          | MBP                 | Mm01266402_m1   |
| <i>interleukin-10</i>                                | IL-10               | Mm01288386_m1   |
| <i>tumor necrosis factor alpha</i>                   | TNF $\alpha$        | Mm00443258_m1   |
| <i>beta-2-microglobulin</i>                          | B-2m                | Mm00437762      |
